# Supplementary material for: The role of exon shuffling in shaping protein-protein interaction networks
Source: PubMed Central journal article supplement (PMC3045794; doi:10.1186/1471-2164-11-s5-s11), 2010-12-22
Supplement: 1471-2164-11-S5-S11-S1.pdf [file 1471-2164-11-S5-S11-S1.pdf]

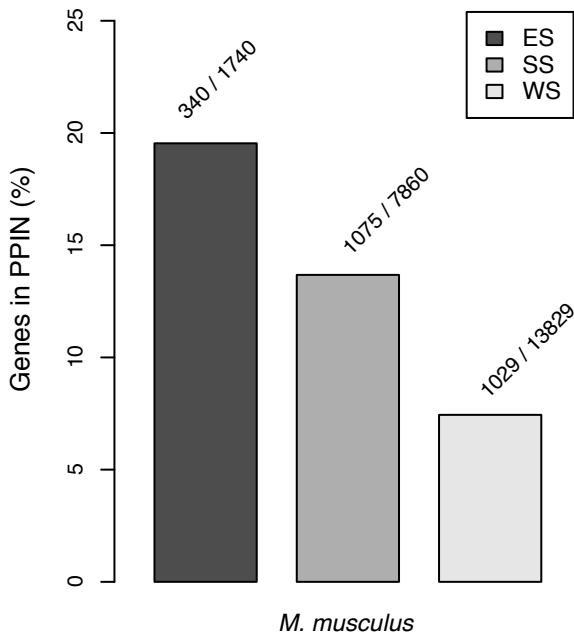

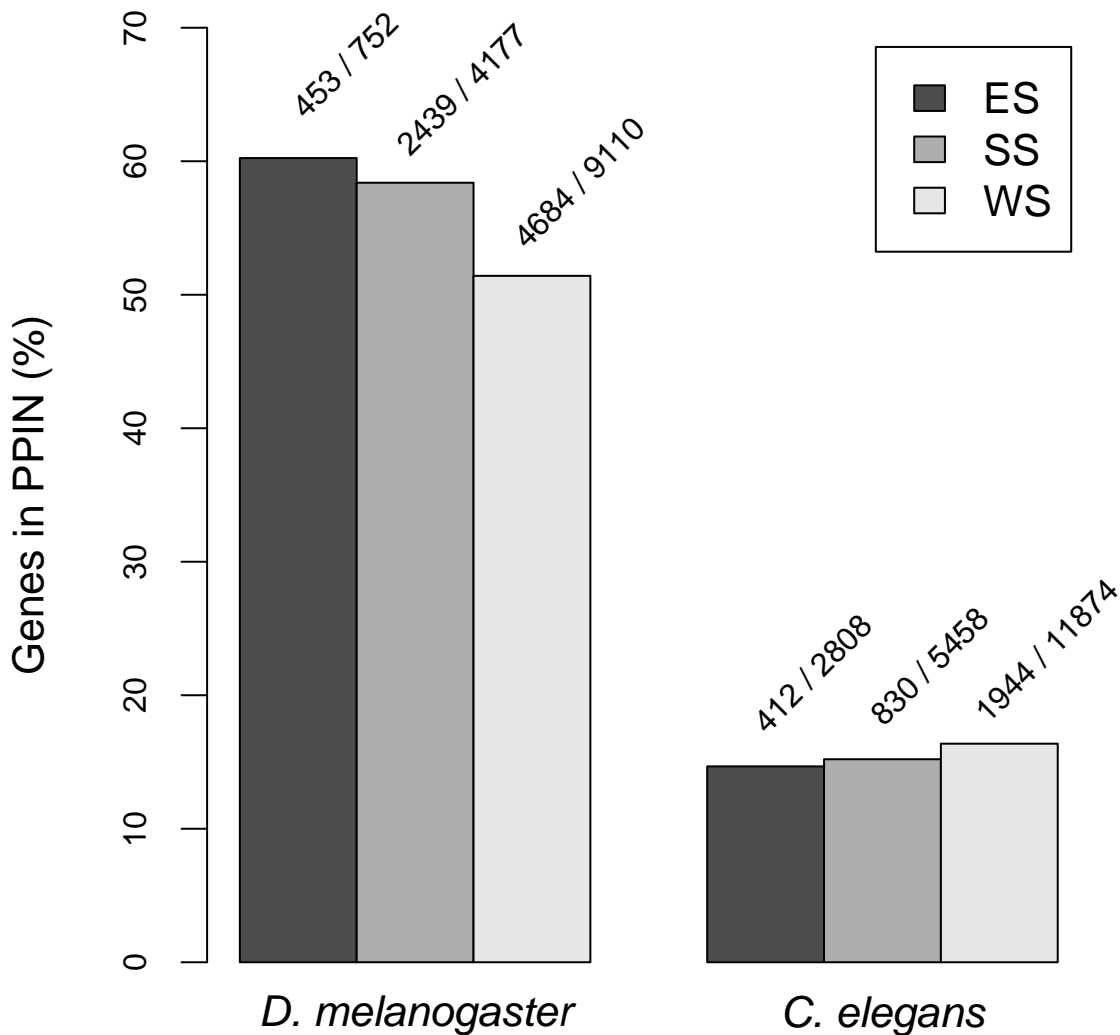

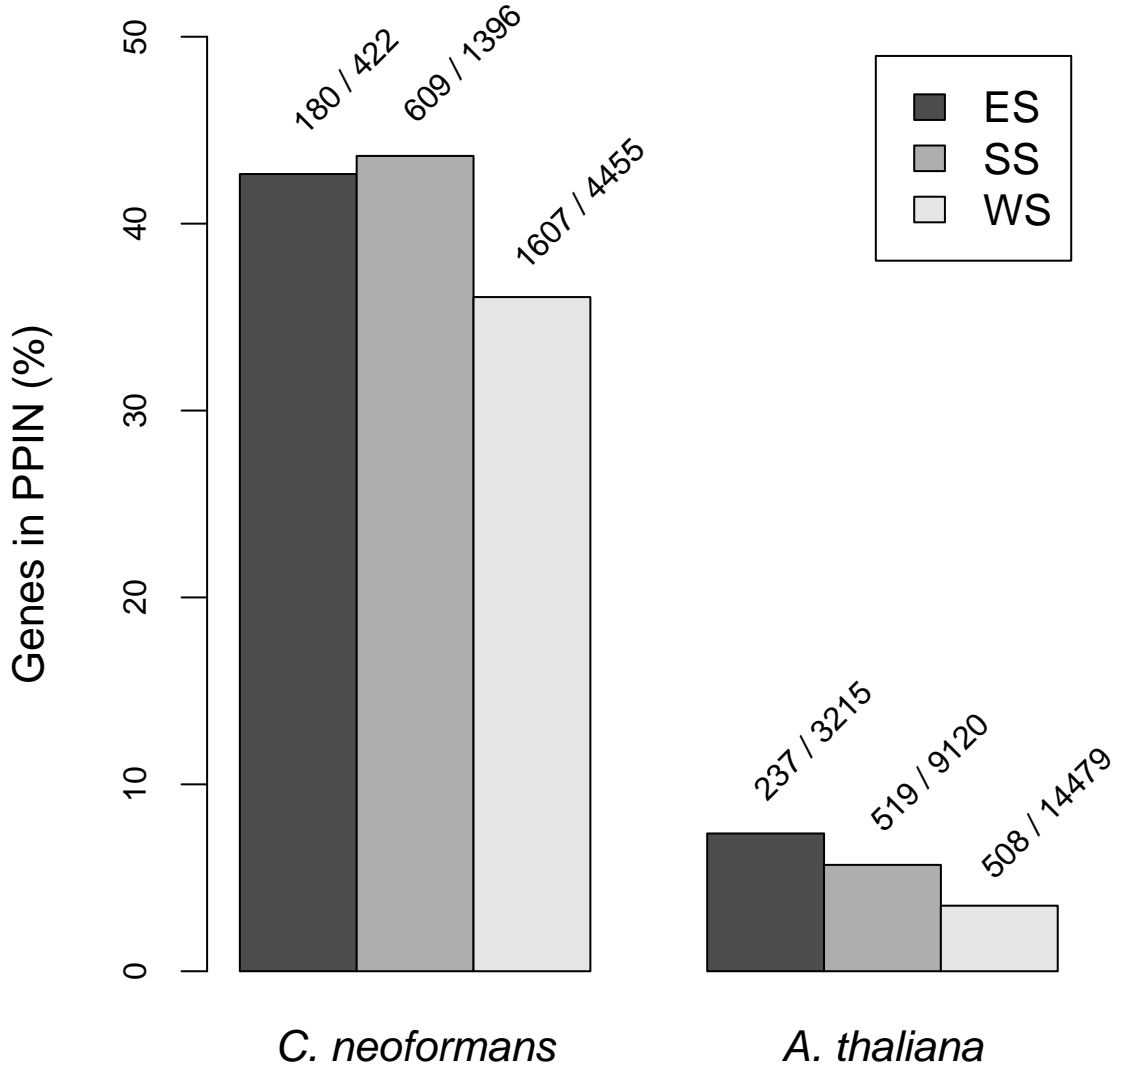

|                  | <i>M .musculus</i> |         | <i>D. melanogaster</i> |         | <i>C. elegans</i> |       |
|------------------|--------------------|---------|------------------------|---------|-------------------|-------|
|                  | $\chi^2$           | p       | $\chi^2$               | p       | $\chi^2$          | p     |
| <b>ES vs. SS</b> | 51.8               | 1.9E-12 | 0.8                    | >0.05   | 0.0               | >0.05 |
| <b>ES vs. WS</b> | 240.9              | 7.5E-54 | 21.4                   | 1.1E-05 | 3.1               | >0.05 |
| <b>SS vs. WS</b> | 207.9              | 1.2E-46 | 55.8                   | 2.4E-13 | 3.7               | >0.05 |

|                  | <i>C. neoformans</i> |         | <i>A. thaliana</i> |         |
|------------------|----------------------|---------|--------------------|---------|
|                  | $\chi^2$             | p       | $\chi^2$           | p       |
| <b>ES vs. SS</b> | 0.1                  | >0.05   | 11.4               | 2.2E-03 |
| <b>ES vs. WS</b> | 6.9                  | 0.026   | 96.4               | 2.7E-22 |
| <b>SS vs. WS</b> | 25.4                 | 1.4E-06 | 63.5               | 4.8E-15 |
