# Supplementary material for: The role of exon shuffling in shaping protein-protein interaction networks
Source: PubMed Central journal article supplement (PMC3045794; doi:10.1186/1471-2164-11-s5-s11), 2010-12-22
Supplement: 1471-2164-11-S5-S11-S2.pdf [file 1471-2164-11-S5-S11-S2.pdf]

# A

Length

$1042 \pm 1340$

$767 \pm 655$

$456 \pm 418$

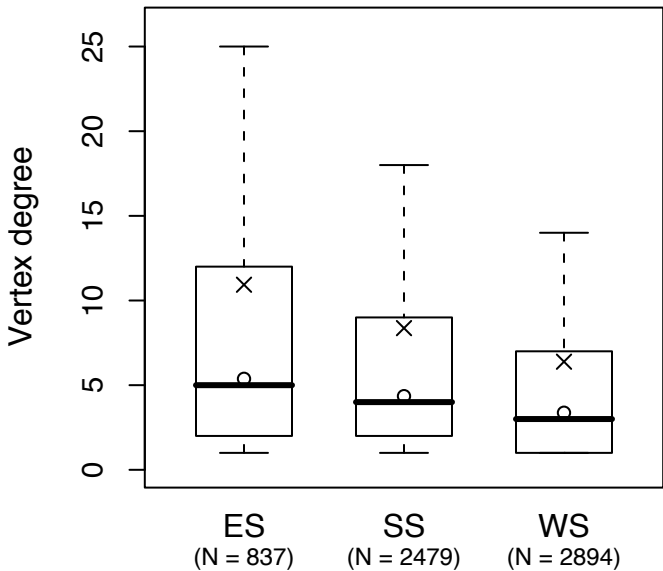

# B

Length

$1033 \pm 812$

$748 \pm 629$

$439 \pm 402$

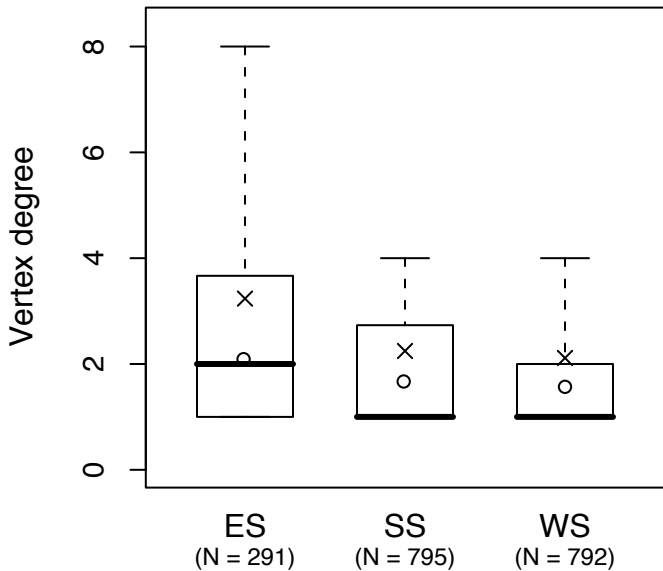

# C

Length

$902 \pm 821$

$786 \pm 821$

$473 \pm 409$

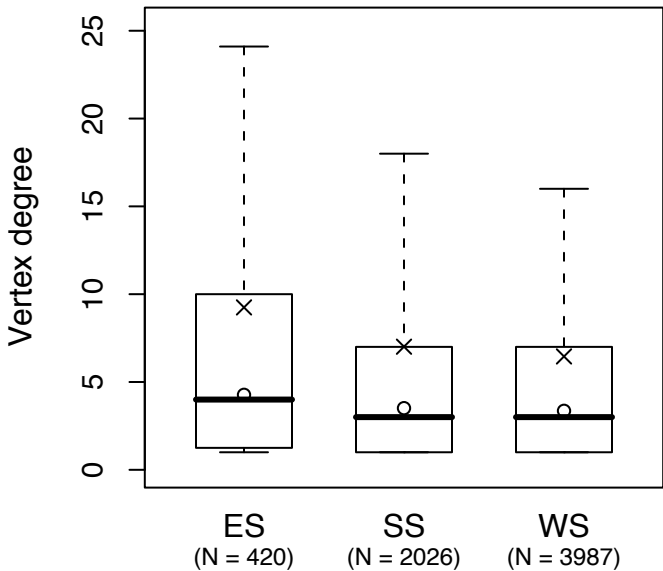

# D

Length

$649 \pm 585$

$635 \pm 560$

$423 \pm 325$

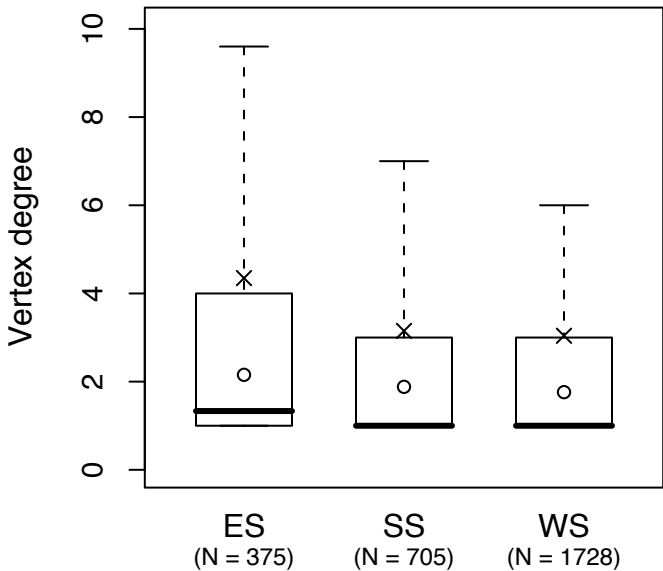

# E

| PARALOG CONFLUENCE         |          |            |          |      |                         |     |            |      |         |
|----------------------------|----------|------------|----------|------|-------------------------|-----|------------|------|---------|
| RESAMPLING PROCEDURE       |          |            |          |      |                         |     |            |      | U TEST  |
| WITHOUT CONTROL FOR LENGTH |          |            |          |      | WITH CONTROL FOR LENGTH |     |            |      |         |
| Mean                       |          | Geom. Mean |          |      | Mean                    |     | Geom. Mean |      |         |
| p                          | Z        | p          | Z        | p    | Z                       | p   | Z          | p    |         |
| <b>ES vs. SS</b>           | <6.0E-06 | 4.3        | 3.0E-05  | 4.7  | 0.0012                  | 3.5 | 0.00042    | 3.9  | 0.0018  |
| <b>ES vs. WS</b>           | <6.0E-06 | 9.0        | <6.0E-06 | 10.5 | <6.0E-05                | 6.1 | <6.0E-05   | 8.5  | 1.1E-08 |
| <b>SS vs. WS</b>           | <3.0E-05 | 5.9        | <3.0E-05 | 8.2  | <1.2E-04                | 5.6 | <1.2E-04   | ≥8.2 | 0.0014  |

Z indicates difference between real data and the resampling mean given in standard deviations of the resampling mean.

# F

| ALL GENES IN THE NETWORK   |          |            |          |      |                         |            |          |       |         |
|----------------------------|----------|------------|----------|------|-------------------------|------------|----------|-------|---------|
| RESAMPLING PROCEDURE       |          |            |          |      |                         |            |          |       | U TEST  |
| WITHOUT CONTROL FOR LENGTH |          |            |          |      | WITH CONTROL FOR LENGTH |            |          |       |         |
| Mean                       |          | Geom. Mean |          | Mean |                         | Geom. Mean |          |       |         |
| p                          | Z        | p          | Z        | p    | Z                       | p          | Z        | p     |         |
| <b>ES vs. SS</b>           | <3.0E-05 | 5.3        | <3.0E-05 | 4.6  | <3.0E-05                | ≥5.3       | <3.0E-05 | ≥4.6  | 0.0017  |
| <b>ES vs. WS</b>           | <3.0E-05 | 6.0        | <3.0E-05 | 5.9  | <3.0E-05                | ≥6.0       | <3.0E-05 | ≥5.9  | 1.1E-06 |
| <b>SS vs. WS</b>           | >0.05    | 1.2        | >0.05    | 2.2  | -----                   | -----      | -----    | ----- | 0.026   |

Z indicates difference between real data and the resampling mean given in standard deviations of the resampling mean.

# G

| PARALOG CONFLUENCE         |          |     |            |     |                         |       |            |       |         |
|----------------------------|----------|-----|------------|-----|-------------------------|-------|------------|-------|---------|
| RESAMPLING PROCEDURE       |          |     |            |     |                         |       |            |       | U TEST  |
| WITHOUT CONTROL FOR LENGTH |          |     |            |     | WITH CONTROL FOR LENGTH |       |            |       |         |
|                            | Mean     |     | Geom. Mean |     | Mean                    |       | Geom. Mean |       |         |
|                            | p        | Z   | p          | Z   | p                       | Z     | p          | Z     | p       |
| <b>ES vs. SS</b>           | <3.0E-05 | 5.2 | 0.00033    | 4.0 | <3.0E-05                | ≥5.2  | ≤0.00033   | ≥4.0  | 0.021   |
| <b>ES vs. WS</b>           | <3.0E-05 | 5.7 | <3.0E-05   | 5.5 | <3.0E-05                | ≥5.7  | <3.0E-05   | ≥5.5  | 1.9E-05 |
| <b>SS vs. WS</b>           | >0.05    | 1.1 | >0.05      | 2.3 | -----                   | ----- | -----      | ----- | 0.012   |

Z indicates difference between real data and the resampling mean given in standard deviations of the resampling mean.

# H

| ALL GENES IN THE NETWORK   |         |            |         |      |                         |            |         |       |         |
|----------------------------|---------|------------|---------|------|-------------------------|------------|---------|-------|---------|
| RESAMPLING PROCEDURE       |         |            |         |      |                         |            |         |       | U TEST  |
| WITHOUT CONTROL FOR LENGTH |         |            |         |      | WITH CONTROL FOR LENGTH |            |         |       |         |
| Mean                       |         | Geom. Mean |         | Mean |                         | Geom. Mean |         |       |         |
| p                          | Z       | p          | Z       | p    | Z                       | p          | Z       | p     |         |
| <b>ES vs. SS</b>           | 2.7E-03 | 3.5        | 3.9E-03 | 3.3  | 3.9E-03                 | 3.4        | 4.2E-03 | 3.2   | 0.030   |
| <b>ES vs. WS</b>           | 1.8E-04 | 4.8        | 6.0E-05 | 4.3  | ≤1.8E-04                | 4.8        | 6.0E-05 | 4.3   | 9.3E-04 |
| <b>SS vs. WS</b>           | >0.05   | 1.7        | >0.05   | 1.6  | -----                   | -----      | -----   | ----- | >0.05   |

Z indicates difference between real data and the resampling mean given in standard deviations of the resampling mean.



|

| PARALOG CONFLUENCE         |         |            |         |     |                         |       |            |       |         |
|----------------------------|---------|------------|---------|-----|-------------------------|-------|------------|-------|---------|
| RESAMPLING PROCEDURE       |         |            |         |     |                         |       |            |       | U TEST  |
| WITHOUT CONTROL FOR LENGTH |         |            |         |     | WITH CONTROL FOR LENGTH |       |            |       |         |
| Mean                       |         | Geom. Mean |         |     | Mean                    |       | Geom. Mean |       |         |
| p                          | Z       | p          | Z       | p   | Z                       | p     | Z          | p     |         |
| <b>ES vs. SS</b>           | 2.7E-03 | 3.6        | >0.05   | 3.0 | ≤0.0027                 | ≥3.6  | -----      | ----- | 9.3E-03 |
| <b>ES vs. WS</b>           | 1.2E-05 | 5.1        | 5.4E-05 | 4.3 | ≤1.2E-05                | ≥5.1  | ≤5.4E-05   | ≥4.3  | 4.8E-04 |
| <b>SS vs. WS</b>           | >0.05   | 2.0        | >0.05   | 2.0 | -----                   | ----- | -----      | ----- | >0.05   |

Z indicates difference between real data and the resampling mean given in standard deviations of the resampling mean.

# J

| ALL GENES IN THE NETWORK   |       |     |            |     |                         |       |            |       |        |
|----------------------------|-------|-----|------------|-----|-------------------------|-------|------------|-------|--------|
| RESAMPLING PROCEDURE       |       |     |            |     |                         |       |            |       | U TEST |
| WITHOUT CONTROL FOR LENGTH |       |     |            |     | WITH CONTROL FOR LENGTH |       |            |       |        |
|                            | Mean  |     | Geom. Mean |     | Mean                    |       | Geom. Mean |       |        |
|                            | p     | Z   | p          | Z   | p                       | Z     | p          | Z     | p      |
| <b>ES vs. SS</b>           | 0.024 | 2.8 | >0.05      | 2.2 | >0.05                   | 2.0   | -----      | ----- | >0.05  |
| <b>ES vs. WS</b>           | 0.040 | 2.9 | 2.4E-03    | 3.5 | ≤0.040                  | ≥2.9  | >0.05      | 2.9   | 0.026  |
| <b>SS vs. WS</b>           | >0.05 | 0.0 | >0.05      | 1.3 | -----                   | ----- | -----      | ----- | >0.05  |
| <b>ES vs. SS +<br/>WS</b>  | 0.022 | 3.2 | 4.4E-03    | 3.3 | ≤0.022                  | ≥3.2  | 0.044      | 2.6   | 0.056  |

Z indicates difference between real data and the resampling mean given in standard deviations of the resampling mean.

# K

| PARALOG CONFLUENCE         |       |     |            |     |                         |       |            |       |         |
|----------------------------|-------|-----|------------|-----|-------------------------|-------|------------|-------|---------|
| RESAMPLING PROCEDURE       |       |     |            |     |                         |       |            |       | U TEST  |
| WITHOUT CONTROL FOR LENGTH |       |     |            |     | WITH CONTROL FOR LENGTH |       |            |       |         |
|                            | Mean  |     | Geom. Mean |     | Mean                    |       | Geom. Mean |       |         |
|                            | p     | Z   | p          | Z   | p                       | Z     | p          | Z     | p       |
| <b>ES vs. SS</b>           | 0.032 | 2.7 | >0.05      | 2.4 | >0.05                   | 1.7   | -----      | ----- | >0.05   |
| <b>ES vs. WS</b>           | 0.040 | 2.9 | 2.8E-04    | 4.3 | ≤0.040                  | ≥2.9  | 3.2E-04    | 4.1   | 3.2E-03 |
| <b>SS vs. WS</b>           | >0.05 | 0.3 | >0.05      | 1.9 | -----                   | ----- | -----      | ----- | >0.05   |
| <b>ES vs. SS +<br/>WS</b>  | 0.028 | 3.1 | 4.4E-04    | 3.9 | ≤0.028                  | ≥3.1  | 9.8E-03    | 3.1   | 0.010   |

Z indicates difference between real data and the resampling mean given in standard deviations of the resampling mean.

L

| ALL GENES IN THE NETWORK   |        |            |         |      |                         |            |         |       |         |
|----------------------------|--------|------------|---------|------|-------------------------|------------|---------|-------|---------|
| RESAMPLING PROCEDURE       |        |            |         |      |                         |            |         |       | U TEST  |
| WITHOUT CONTROL FOR LENGTH |        |            |         |      | WITH CONTROL FOR LENGTH |            |         |       |         |
| Mean                       |        | Geom. Mean |         | Mean |                         | Geom. Mean |         |       |         |
| p                          | Z      | p          | Z       | p    | Z                       | p          | Z       | p     |         |
| <b>ES vs. SS</b>           | >0.05  | -2.1       | >0.05   | -1.6 | -----                   | -----      | -----   | ----- | >0.05   |
| <b>ES vs. WS</b>           | >0.05  | -0.6       | >0.05   | 0.7  | -----                   | -----      | -----   | ----- | >0.05   |
| <b>SS vs. WS</b>           | 0.0057 | 3.2        | 1.4E-04 | 4.1  | ≤0.0057                 | ≥3.2       | 3.6E-04 | 3.6   | 1.6E-04 |

Z indicates difference between real data and the resampling mean given in standard deviations of the resampling mean.

# M

| ALL GENES IN THE NETWORK   |         |            |          |      |                         |            |          |       |         |
|----------------------------|---------|------------|----------|------|-------------------------|------------|----------|-------|---------|
| RESAMPLING PROCEDURE       |         |            |          |      |                         |            |          |       | U TEST  |
| WITHOUT CONTROL FOR LENGTH |         |            |          |      | WITH CONTROL FOR LENGTH |            |          |       |         |
| Mean                       |         | Geom. Mean |          | Mean |                         | Geom. Mean |          |       |         |
| p                          | Z       | p          | Z        | p    | Z                       | p          | Z        | p     |         |
| <b>ES vs. SS</b>           | >0.05   | -1.9       | >0.05    | -1.9 | -----                   | -----      | -----    | ----- | >0.05   |
| <b>ES vs. WS</b>           | >0.05   | 1.5        | 3.9E-04  | 3.9  | -----                   | -----      | ≤3.9E-04 | ≥3.9  | 6.9E-05 |
| <b>SS vs. WS</b>           | 4.8E-05 | 4.1        | <1.2E-03 | 6.9  | ≤4.8E-05                | ≥4.1       | ≤1.2E-03 | ≥6.9  | 2.4E-12 |

Z indicates difference between real data and the resampling mean given in standard deviations of the resampling mean.
