# Supplementary material for: The role of exon shuffling in shaping protein-protein interaction networks
Source: PubMed Central journal article supplement (PMC3045794; doi:10.1186/1471-2164-11-s5-s11), 2010-12-22
Supplement: 1471-2164-11-S5-S11-S3.pdf [file 1471-2164-11-S5-S11-S3.pdf]

# A

Length

$538 \pm 418$

$642 \pm 658$

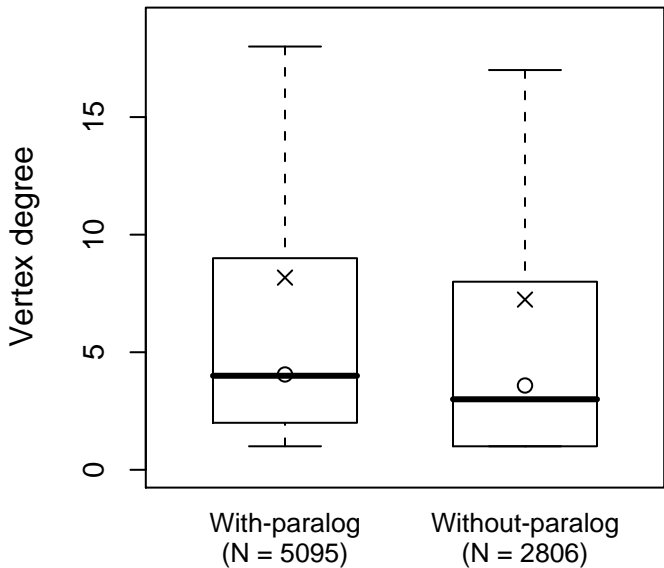

# B

Length

$529 \pm 390$

$667 \pm 711$

Vertex degree

5  
4  
3  
2  
1  
0

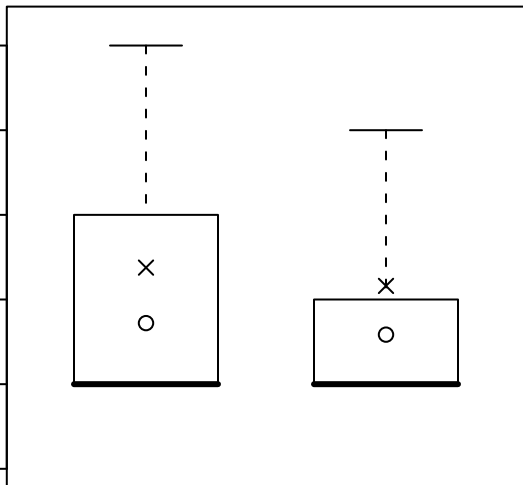

With-paralog  
(N = 1463)

Without-paralog  
(N = 641)

# C

Length

$507 \pm 387$

$593 \pm 644$

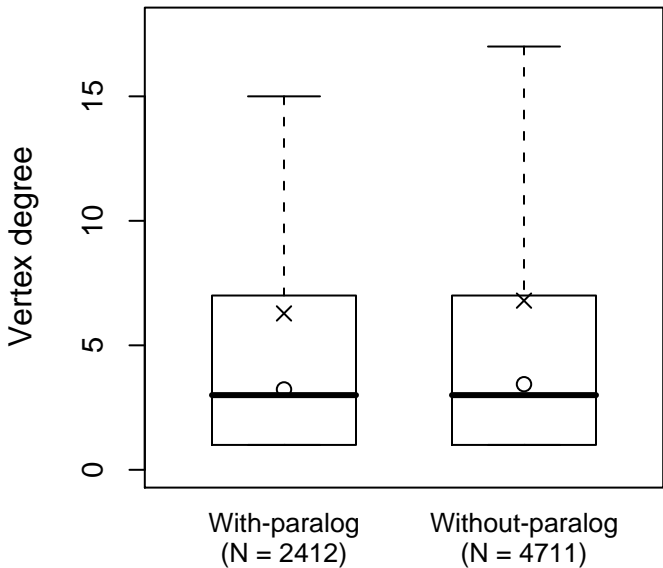

# D

Length

$432 \pm 297$

$502 \pm 459$

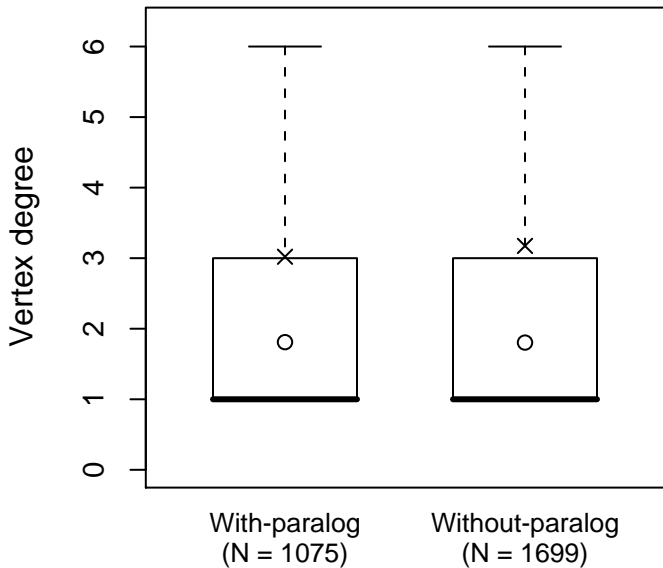

Length

$485 \pm 277$

$606 \pm 444$

Vertex degree

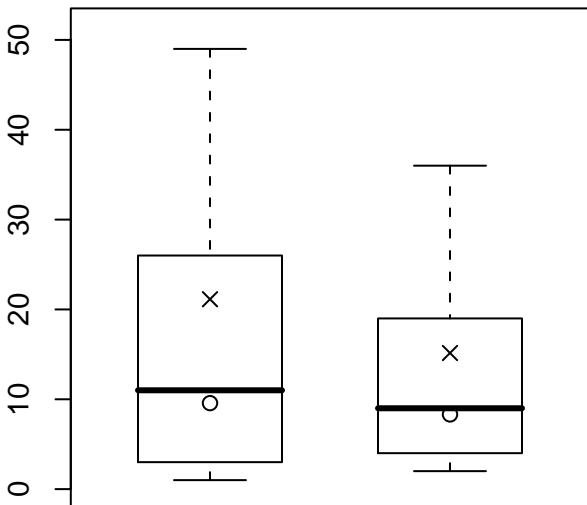

With-paralog  
(N = 342)

Without-paralog  
(N = 2053)

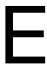

Length

$419 \pm 260$

$501 \pm 360$

Vertex degree

8

6

4

2

0

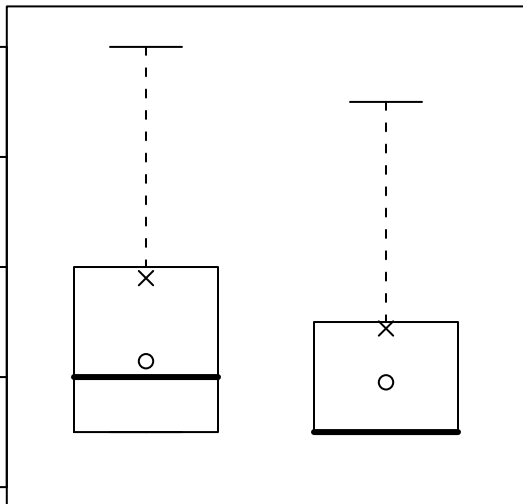

With-paralog  
(N = 973)

Without-paralog  
(N = 290)

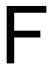

# G

|                    | RESAMPLING PROCEDURE |     |            |     | U TEST  |
|--------------------|----------------------|-----|------------|-----|---------|
|                    | Mean                 |     | Geom. Mean |     |         |
|                    | p                    | Z   | p          | Z   |         |
| <i>H. sapiens</i>  | 0.0043               | 2.8 | <2.0E-06   | 4.7 | 1.5E-06 |
| <i>M. musculus</i> | >0.05                | 1.7 | 0.011      | 2.5 | 0.004   |

Z indicates difference between real data and the resampling mean given in standard deviations of the resampling mean.

# H

|                        | RESAMPLING PROCEDURE |      |            |      | U TEST |
|------------------------|----------------------|------|------------|------|--------|
|                        | Mean                 |      | Geom. Mean |      | p      |
|                        | p                    | Z    | p          | Z    |        |
| <i>D. melanogaster</i> | 0.044                | -2.0 | 0.019      | -2.3 | 0.025  |
| <i>C. elegans</i>      | >0.05                | -0.6 | >0.05      | 0.1  | >0.05  |

Z indicates difference between real data and the resampling mean given in standard deviations of the resampling mean.



|

|                      | RESAMPLING PROCEDURE |     |            |     | U TEST  |
|----------------------|----------------------|-----|------------|-----|---------|
|                      | Mean                 |     | Geom. Mean |     |         |
|                      | p                    | Z   | p          | Z   | p       |
| <i>C. neoformans</i> | 2.2E-05              | 4.7 | 0.022      | 2.3 | 0.022   |
| <i>A. thaliana</i>   | 3.7E-04              | 3.1 | 1.9E-04    | 3.6 | 3.2E-04 |

Z indicates difference between real data and the resampling mean given in standard deviations of the resampling mean.
