# Supplementary material for: The role of exon shuffling in shaping protein-protein interaction networks
Source: PubMed Central journal article supplement (PMC3045794; doi:10.1186/1471-2164-11-s5-s11), 2010-12-22
Supplement: 1471-2164-11-S5-S11-S4.pdf [file 1471-2164-11-S5-S11-S4.pdf]

# 4A

---

## Self-interacting vertices

---

|           |                  |
|-----------|------------------|
| <b>ES</b> | 34.2% (286/837)  |
| <b>SS</b> | 29.8% (738/2479) |
| <b>WS</b> | 25.4% (736/2894) |

---

4B

| PARALOG CONFLUENCE |                 |          |                                              |     |
|--------------------|-----------------|----------|----------------------------------------------|-----|
|                    | CHI-SQUARE TEST |          | RESAMPLING PROCEDURE WITH CONTROL FOR LENGTH |     |
|                    | p               | $\chi^2$ | p                                            | Z   |
| ES vs. SS          | 0.057           | 5.5      | <1.0E-04                                     | 4.1 |
| ES vs. WS          | 2.3E-06         | 24.5     | <1.0E-04                                     | 8.1 |
| SS vs. WS          | 1.3E-03         | 12.4     | <1.0E-04                                     | 4.9 |
